# Supplementary material for: Characterization of the Soybean GmIREG Family Genes and the Function of GmIREG3 in Conferring Tolerance to Aluminum Stress
Source: PubMed Central journal article supplement (PMC7013977; doi:10.3390/ijms21020497), 2020-01-13
Supplement: ijms-21-00497-s001.pdf [file ijms-21-00497-s001.pdf]

## Supplementary Material

### 1 Supplementary Data

#### 1.1 CDS sequencing information of *GmIREG3*

ATGGAAGAAACCTTCATATTGAGGAGAGAGCCTCTTCTTGCCCAACATCAAGAAACCCC  
ATCTTCTTTAATCAATCATTGTATATTGGTCACTTCTTAGCTAGATGGGGTGCCAGGAT  
GTGGGAATTCTCTGTTGGTTTATATATGATCAACATTTGGCCAGACTCATTGCTGTATGC  
AGCAATATATGGTGTCTGTAGAATCTGCCTCCATTGCACTGTTTGGTTCATAATTGGAAG  
ATGGGTTGACAAGTTGTGTTATGTGAAGGTTTTGCAGTTGTGGTTGGTGACACAGAATCT  
CTTTTTGTTGTTGCTGGGGCCACTGTAGTTGCTTTACTACTCAACTCATCTTTGAAGTTG  
ACAAATTTCTCAGCTTTCATATTGATGGTGTGACAATCAATATCTGTGGTGGCATTGGT  
GTACTTTCAACTCTTGCTGGTACAATATTGATTGAAAGAGAGTGGTTGTTAGTTATATCT  
GAAGGTCAACCCCCAGAATTTCTTACAAAGATGAATTCAGTAACGAGACGCATTGATCT  
AACCTGCAAGCTTCTTGCTCCTGTTGTTACTGGGTTTATAATAAGCTTTGTATCACTGAA  
AGCATCTGCTATAACTTTAGCACTATGGAATACTGTGTCTGTTTGGGTGGAGTATTGGCT  
TTTCACATCTGTATATAAAGGGATTCCAGCTTTGGGTCAAAGTAGCCAGAGGAGAATGG  
CAAGACTTTTAGAAAGTGATCAAGAAAGGAGCAATCCAACATTGGAGGGAGATAGATT  
GCTTCCTGTTACTGATGGTAGCTCAGAATTGGTAGATAGAAAATGCAGTAAAAAACTTT  
ATGAGAAGATTTTACAGAGATTCCTTATATTGCTGCATGGAGAGTATATTTACAGCAAGAA  
GTTGTCCTTCTGGACTAGCTCTGGCTTTGCTATTTTTACTGTACTCAGCTTTGGAACCT  
TGATGACAGCCACCTTAGAATGGGAAGGGATACCTGCATACGTTATTGGATTAGCAAGA  
GGAATAAGCGCTCTGATTGGAATAGCTGCAACAATTGTATATCCTCTGCTACAGTCTCAT  
ATATCAAGTATTAGAACTGGACTGTGGTCTATATGGTCTCAGTGGACTTGCCTTCTTCCA  
TGTATAGCTGCAATTTGGATCCAAAATGGCTTTCTATCATCATATATTCTGATGGGAAGT  
GTAGCCATATCTCGGCTTGGATTGTGGATGTTTGTATTGTCTGTGCTTCAACAAATGCAG  
GATCTTGTTCCTGAATCTGATCGTTTGTATTGTTGGAGGTGTTTCAAGAACTCACTTCAGTCA  
TTGATGGACTTATTGGCCTATGTTATGGGAATCATATTATCTGATCCAGGGGACTTCTGG  
AAGTTGACTTTGTTATCATTCTAGCAGTCACATTAGCTGCATTCTCTACTGCATCCATG  
TATACCGTGTGCGAAAGCACATCTTCACTTCGATCGTGTTATGTGGAGCAAATGTTTTTC  
TAGGAGCATCTTAA

Coding sequence (CDS) of *GmIREG3* is 1509 bp which was cloned with the probe sequence using HX3 line of *Glycine max* and sequenced by Sangon Biotech.

#### 1.2 Promoter sequencing information of *GmIREG3*

GACTTAGACACGATGCAGATTGAAGAATTACAACATTCTCTTGAGGCACATGAGATGAC  
AATCAATAAGTGAAGATCCCATCAAGAACAAGTACTTCATGTACATTCCAATTACAAAG  
GGAAAGAACCATGGAAGGGAAACAAGTCAAACACCACCACAAAGAACCAGGAACAAG  
TGATAGTTGAAGGTAGTGAATCCTCCAAAGGAAAAACAACATGCCAAACTTCTCAGAAA  
TCAAACCTGCAACAACAACAAGGAGTGGAAAGCTCGACAAAAGAAAGGTGAAATGCTACA  
ACTGTCAAAAACCTTGGTCATTATGCAAAAAGAATTTGGCAAGGAGAAGGTGCCAAGAAC  
AAACTCAATAATCATGCAAATTTGGCTCAAGATGAAGGCTCAGATTCTGAACTTGTATT  
GCTTATGGCTACCATTAGCAGTGAATCATCAAGCGACTTCTCATGGTACTTAGATTCTGG  
TTGCTCCACTCATATGACAAGGAAGAGGGATTGGTTCATCAATCTAAATAAATCATCCA  
AGAGCTGAGTTTGCTTTGCAGATGATAGTACATTGATTGCTGAAGGTATTGAAAAAGTA

GCATTCAGAAGAAGAATGGAAAAGACACTGTCATTGAGGAGGTGTTGTTTGTACCTGGC  
 ATGAAGACTAATCTGTTAAGCCTAGGCCAACTACTTGAAAAGGGGTTTGTATGAGGAT  
 GAATGACAATTGTCTCAAAGTGTGGATAAAGTCCAAAACTTGTGATTAAGACAGACT  
 TGTCTCAAAACAAGACCTTTAGGATTGGGATGAATATTCTGAAGCATAAGTGTCTTGCA  
 ACCTCAGAAAACAAGATGGAGTGGTTATGGCATCATAGATTTGGTCATCTCAACTTCAA  
 GGACCTATATCTTCTTACCTGACACAAAATGGTTGAAGGACTACTTCAGGTCTTAGTCCC  
 ACAGAGGTGTGCAAAGAGTGTATTGAATGCAAGCAAGCCAAAAGCATCTTCAACAAGT  
 ATATTCTCACAAATAATAATTAATTATCATGAATTGCATCTCATAGTAAATATGATACCG  
 GCCATTTCTCTCTTTTTCTCTGTATTTTTTAAATTTATAGTAGTGATATATAAATATCA  
 CTATTTAATAAACACAATCAATAACACTCATTCTTTTGTCTTTCTATCACATTATAATATT  
 TATTATGCTTATATTTCTTTTTTCCCTCTCTTTTTAGGTGTTAAAGAGGACATGAGTGTT  
 CATTGATATATATTTTTCTAAATTTTATTATCAATGTAGAGACTTTTTTTAGGATATCCAT  
 GTAAAACTTTATTAAGTGGGTGATACTTGTGTAAGAATTCTATGAATTTTGAAATATTT  
 AATAATTAATATATTTACATTATTGTCTCATTTTAATTTTCATTTTTATTGATAATAAGA  
 TTGTTCACTTTTATAATAATTATTTTAAAAAATTAGGATTAATTTTGATGGATTAATAAG  
 ATAAAAAATCTATTATATCCATATTAATAAATTAAATTCATATCCTTGTGCGGTA  
 AACTTTCTAGGCTCATCTTATATATAAAAAAATGTACAAACAACAAATCATGAACTAT  
 TGATATTCAATAGATTTTCATTTAAAAAATTGTACCGCGACGTGATGTTTGTGGAACGATC  
 CATGATCTTTTGTGCATTTCTTGTTAGCATTACTCAGTTATAACTTGGTTAGGTAACACAA  
 CTTAGATTCCAGGTGCTATTCAACGAAAGTATATTATTCTATAGCTTTGATAAGAGGAAA  
 ACTGTCTGTTTCGGCCTCCAATTATTATTATTTATTTGTTAATTTGTTTGTATCATTGAC  
 TCATCATCGTATATATGGACAAAGGACAGAACTGCATGTTGCTTGCTTTAGATAATCTT  
 TGTAATACTAATTAATGGTCAAAGGAGTGAGTGAGGGGAAGAATCTGAT

Promoter sequence of *GmIREG3* is 1958 bp which was cloned with the probe sequence using HX3 line of *Glycine max* and sequenced by Sangon Biotech.

## 2 Supplementary Figures and Tables

### 2.1 Supplementary Figures

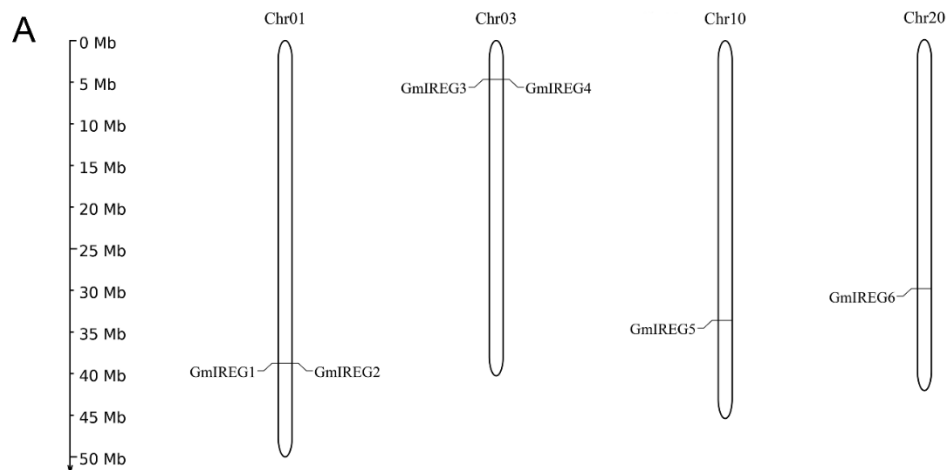

B

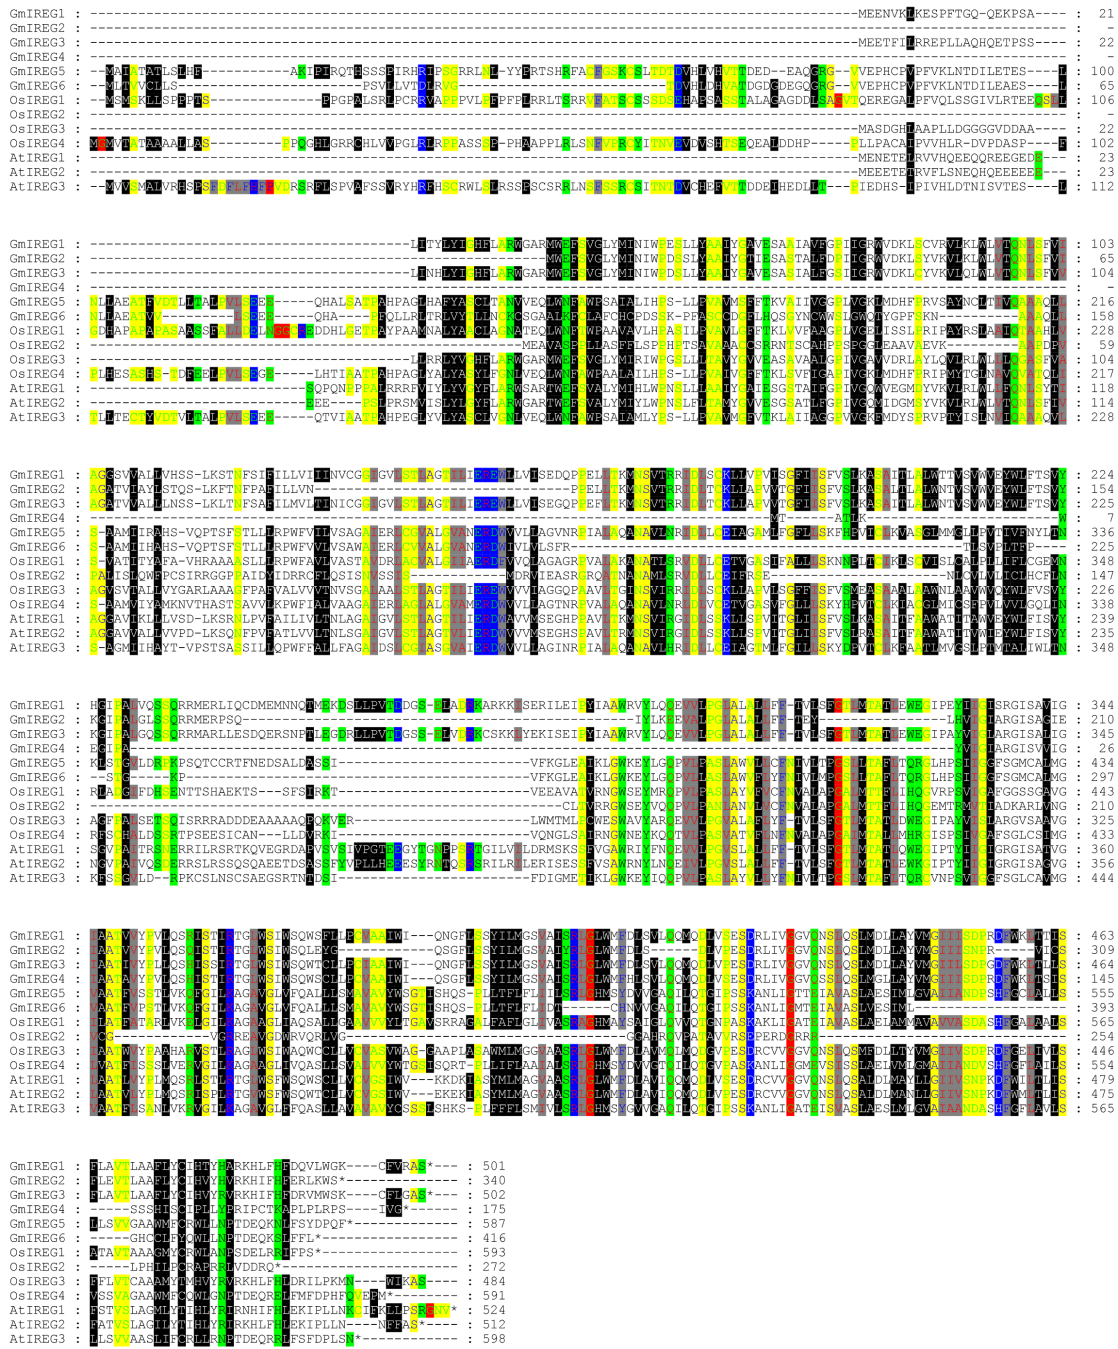

**Supplementary Figure S1.** Chromosomal positions and multiple alignment of soybean IREG family genes. (A) Positions of IREG family genes on soybean chromosomes. (B) Multiple alignment was performed with Clustal W and the residues were colored using Genedoc software.

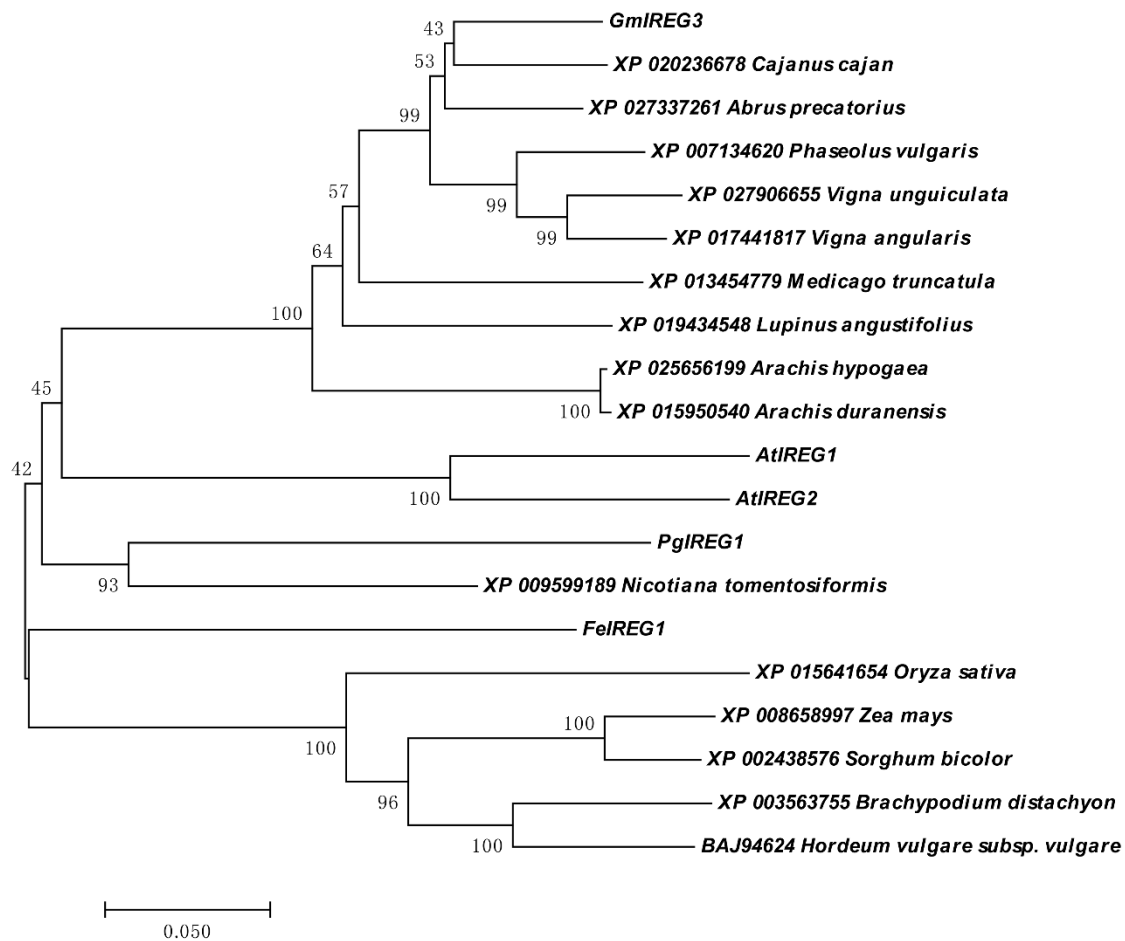

**Supplementary Figure S2.** Phylogenetic relationship of *GmIREG3* and the other IREG family genes from different species. The phylogenetic tree was constructed using the neighbour-joining method with 1,000 bootstrap replicates by MEGA 7.0 software. The accession numbers for IREG family genes from different species are shown with accession numbers and species, and other accession numbers are as follows: *AtIREG1* (At2g38460), *AtIREG2* (At5g03570) and *PgIREG1* (CCM80483.1). The amino acid sequence of *FeIREG1* can be found in Yokosho et al. (2016).

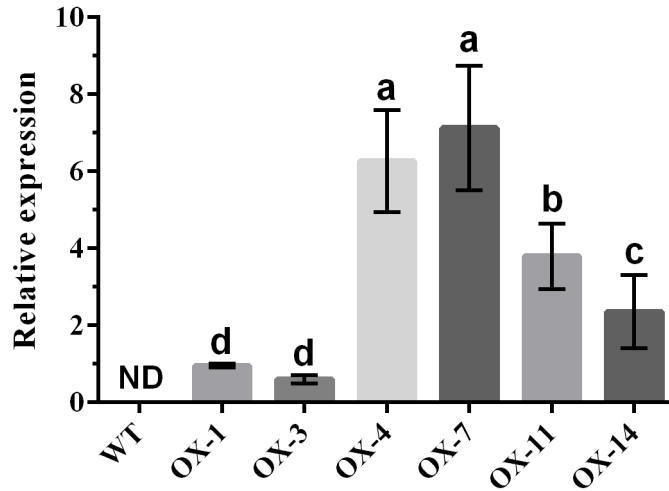

**Supplementary Figure S3.** *GmIREG3* overexpression in Arabidopsis. qRT-PCR determination of *GmIREG3*-overexpressing Arabidopsis lines. Data are means  $\pm$  SD of three biological replicates. Mean differences are significant at the  $P_{0.05}$  level between the bars with different letters and not significant at the  $P_{0.05}$  level with the same letters.

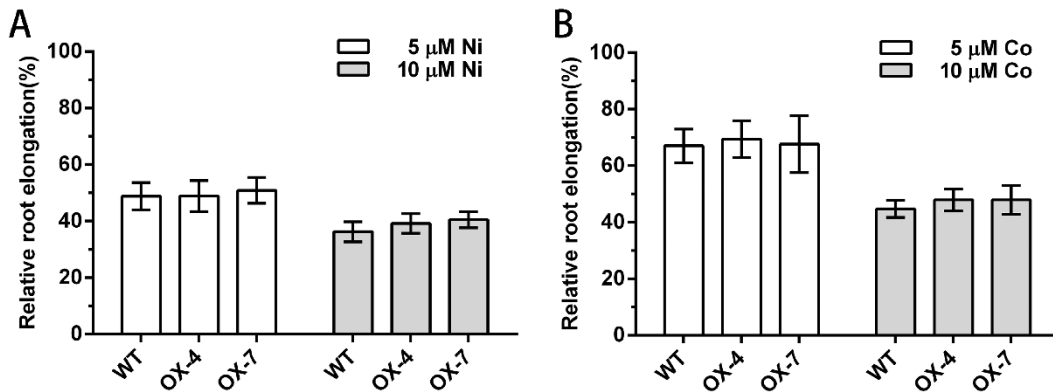

**Supplementary Figure S4.** Ni and Co tolerance of Arabidopsis over-expressing *GmIREG3*. Seedlings were grown on a plate containing 1 mM  $\text{CaCl}_2$  (pH 5.0) in the presence of  $\text{NiCl}_2$  (0, 5, and 10  $\mu$ M) (A), or  $\text{CoCl}_2$  (0, 5 and 10  $\mu$ M) (B). And then root elongation was measured at 3 days after the exposure with a ruler. Root elongations relative to Ni and Co are shown. Data are means  $\pm$  SD (n = 7).

## 2.2 Supplementary Tables

Table S1. Primers used for PCR and real-time PCR.

| Primer name       | Primer sequence (5'-3')                         |
|-------------------|-------------------------------------------------|
| qGmIREG1F         | TGCAACAGTTGTATACCCTGTG                          |
| qGmIREG1R         | GATAAGTCAAACATCCACAATCC                         |
| qGmIREG2F         | CTCCACTGCACTGTTTGATCC                           |
| qGmIREG2R         | GGGGGTTTACCAGCAATATGA                           |
| qGmIREG3F         | GCCTCTTCTTGCCCAACATC                            |
| qGmIREG3R         | GCAAAACCTTCACATAACACAAC                         |
| qGmIREG4F         | TGCAACAGCTGTATATCCTGTG                          |
| qGmIREG4R         | TTGAAGCACAGACAAATGAAAC                          |
| qGmIREG5F         | TCGTCAAACGCATTCATCTT                            |
| qGmIREG5R         | CTCATCCTCATCCGTGGTAA                            |
| qGmIREG6F         | TTGTGCCTTCAACTCTGGTC                            |
| qGmIREG6R         | TTGCTTTGGATGATGGGATT                            |
| GmActin6F         | GCACCACCGGAGAGAAAATA                            |
| GmActin6R         | GTGCACAATTGATGGACCAG                            |
| AtActin2F         | GGTATTGTGCTGGATTCTGG                            |
| AtActin2R         | CGCTCTGCTGTTGTGGTGA                             |
| Clone-GmIREG3F    | GTCAAAGGAGTGAGTGAGGG                            |
| Clone-GmIREG3R    | GATCCAAGAGCCACTATGTCA                           |
| pTF101-GmIREG3F   | gagaacacgggggactctagaATGGAAGAAACCTTCATATTGAGGA  |
| pTF101-GmIREG3R   | cgatcggggaaattcgagctcTTAAGATGCTCCTAGAAAACATTTGC |
| Promoter-GmIREG3F | TTGTGATTGAAGAAAGAAGGTGGTG                       |
| Promoter-GmIREG3R | TGATGTTGGGCAAGAAGAGGC                           |
| P3301-proIREG3F   | tatgaccatgattacgaattcTTAGACACGATGCAGATTGAAGAAT  |
| P3301-proIREG3R   | ttaccctcagatctaccatggATCAGATTCTTCCCCTCACTCACT   |
| p1302-GmIREG3F    | acgggggactcttgaccatggCTATGGAAGAAACCTTCATATTGAG  |
| p1302-GmIREG3R    | aagttcttctccttactagtAGATGCTCCTAGAAAACATTTGC     |
